# Supplementary material
Source: Elsevier journal article supplement (https://www.sciencedirect.com/science/article/pii/S127977072500168X)
Supplement: mmc1 [file 1-s2.0-S127977072500168X-mmc1.pdf]

## Supplementary File. Association between frequency of ramen intake and total mortality

| Frequency of ramen intake | Number of events/subjects | Unadjusted analysis |         | Adjusted analyses* |         |
|---------------------------|---------------------------|---------------------|---------|--------------------|---------|
|                           |                           | HR (95%CI)          | p-value | HR (95%CI)         | p-value |
| Total                     | 145/6725                  |                     |         |                    |         |
| <1 /month                 | 32/1274                   | reference           |         | reference          |         |
| 1-3 times/month           | 59/3139                   | 0.74 (0.48–1.15)    | 0.182   | 0.76 (0.49–1.18)   | 0.225   |
| 1-2 times/week            | 37/1813                   | 0.81 (0.50–1.31)    | 0.384   | 0.70 (0.43–1.15)   | 0.157   |
| ≥3 times/week             | 17/499                    | 1.69 (0.95–3.03)    | 0.077   | 1.52 (0.84–2.75)   | 0.163   |
| Male                      | 85/2349                   |                     |         |                    |         |
| <1 /month                 | 19/360                    | reference           |         | reference          |         |
| 1-3 times/month           | 33/944                    | 0.65 (0.36–1.16)    | 0.144   | 0.67 (0.37–1.22)   | 0.192   |
| 1-2 times/week            | 21/788                    | 0.49 (0.26–0.93)    | 0.028   | 0.48 (0.25–0.92)   | 0.027   |
| ≥3 times/week             | 12/257                    | 0.88 (0.42–1.84)    | 0.733   | 0.84 (0.39–1.81)   | 0.657   |
| Female                    | 60/4376                   |                     |         |                    |         |
| <1 /month                 | 13/914                    | reference           |         | reference          |         |
| 1-3 times/month           | 26/2195                   | 0.83 (0.43–1.62)    | 0.588   | 0.87 (0.44–1.70)   | 0.680   |
| 1-2 times/week            | 16/1025                   | 1.09 (0.53–2.30)    | 0.801   | 1.18 (0.56–2.48)   | 0.672   |
| ≥3 times/week             | 5/242                     | 1.46 (0.52–4.14)    | 0.475   | 1.23 (0.44–3.43)   | 0.685   |
| Age <70                   | 75/4089                   |                     |         |                    |         |
| <1 /month                 | 18/686                    | reference           |         | reference          |         |
| 1-3 times/month           | 28/1974                   | 0.53 (0.29–0.97)    | 0.040   | 0.50 (0.27–0.91)   | 0.024   |
| 1-2 times/week            | 17/1111                   | 0.58 (0.30–1.13)    | 0.107   | 0.46 (0.23–0.92)   | 0.029   |
| ≥3 times/week             | 12/318                    | 1.46 (0.69–3.06)    | 0.322   | 1.02 (0.46–2.22)   | 0.968   |
| Age ≥70                   | 70/2636                   |                     |         |                    |         |
| <1 /month                 | 14/588                    | reference           |         | reference          |         |
| 1-3 times/month           | 31/1165                   | 1.12 (0.59–2.12)    | 0.727   | 1.16 (0.61–2.22)   | 0.651   |
| 1-2 times/week            | 20/702                    | 1.20 (0.60–2.40)    | 0.602   | 1.05 (0.51–2.13)   | 0.898   |
| ≥3 times/week             | 5/181                     | 1.16 (0.41–3.28)    | 0.773   | 0.95 (0.33–2.73)   | 0.925   |
| Noodle soup <1/2          | 72/3750                   |                     |         |                    |         |
| <1 /month                 | 16/845                    | reference           |         | reference          |         |
| 1-3 times/month           | 31/1814                   | 0.90 (0.49–1.66)    | 0.737   | 0.99 (0.53–1.84)   | 0.993   |
| 1-2 times/week            | 19/880                    | 1.14 (0.58–2.24)    | 0.696   | 1.10 (0.55–2.18)   | 0.776   |
| ≥3 times/week             | 6/211                     | 1.52 (0.59–3.92)    | 0.391   | 1.38 (0.53–3.62)   | 0.510   |
| Noodle soup ≥1/2          | 73/2975                   |                     |         |                    |         |
| <1 /month                 | 16/429                    | reference           |         | reference          |         |
| 1-3 times/month           | 28/1325                   | 0.56 (0.30–1.04)    | 0.066   | 0.52 (0.28–0.99)   | 0.047   |
| 1-2 times/week            | 18/933                    | 0.51 (0.26–1.01)    | 0.052   | 0.41 (0.20–0.83)   | 0.004   |
| ≥3 times/week             | 11/288                    | 1.03 (0.47–2.24)    | 0.951   | 0.73 (0.32–1.65)   | 0.445   |
| Alcohol (+)               | 71/3038                   |                     |         |                    |         |
| <1 /month                 | 13/443                    | reference           |         | reference          |         |
| 1-3 times/month           | 25/1354                   | 0.90 (0.49–1.66)    | 0.737   | 0.99 (0.53–1.84)   | 0.993   |
| 1-2 times/week            | 18/960                    | 1.14 (0.58–2.24)    | 0.696   | 1.10 (0.55–2.18)   | 0.776   |
| ≥3 times/week             | 15/281                    | 1.52 (0.59–3.92)    | 0.391   | 1.38 (0.53–3.62)   | 0.510   |
| Alcohol (-)               | 74/3687                   |                     |         |                    |         |
| <1 /month                 | 19/831                    | reference           |         | reference          |         |
| 1-3 times/month           | 34/1785                   | 0.56 (0.30–1.04)    | 0.066   | 0.52 (0.28–0.99)   | 0.047   |
| 1-2 times/week            | 19/853                    | 0.51 (0.26–1.01)    | 0.052   | 0.41 (0.20–0.83)   | 0.004   |
| ≥3 times/week             | 2/218                     | 1.03 (0.47–2.24)    | 0.951   | 0.73 (0.32–1.65)   | 0.445   |

HR: hazard ratio. CI: confidence interval.

\*Multivariate analysis adjusted for age, sex, smoking, alcohol consumption, amount of noodle soup consumed, diabetes, hypertension, dyslipidemia
